# Supplementary material for: Liver group 2 innate lymphoid cells regulate blood glucose levels through IL-13 signaling and suppression of gluconeogenesis
Source: PubMed Central journal article supplement (PMC9478157; doi:10.1038/s41467-022-33171-6), 2022-09-15
Supplement: 41467_2022_33171_MOESM1_ESM.pdf [file 41467_2022_33171_MOESM1_ESM.pdf]

## Supplementary Information

### **Liver group 2 innate lymphoid cells regulate blood glucose levels through IL-13 signaling and suppression of gluconeogenesis**

Masanori Fujimoto<sup>1,2</sup>, Masataka Yokoyama<sup>1</sup>, Masahiro Kiuchi<sup>3</sup>, Hiroyuki Hosokawa<sup>4</sup>, Akitoshi Nakayama<sup>1</sup>, Naoko Hashimoto<sup>1</sup>, Ikki Sakuma<sup>1</sup>, Hidekazu Nagano<sup>1</sup>, Kazuyuki Yamagata<sup>1</sup>, Fujimi Kudo<sup>5</sup>, Ichiro Manabe<sup>5</sup>, Eunyoung Lee<sup>6</sup>, Ryo Hatano<sup>6</sup>, Atsushi Onodera<sup>3, 7</sup>, Kiyoshi Hirahara<sup>3</sup>, Koutaro Yokote<sup>2</sup>, Takashi Miki<sup>6, 8</sup>, Toshinori Nakayama<sup>3, 9</sup>, Tomoaki Tanaka<sup>2, 8\*</sup>

1 Department of Molecular Diagnosis, Graduate School of Medicine, Chiba University, Chiba, Japan.

2 Department of Endocrinology, Hematology and Gerontology, Graduate School of Medicine, Chiba University, Chiba, Japan.

3 Department of Immunology, Graduate School of Medicine, Chiba University, Chiba, Japan.

4 Department of Immunology, Tokai University School of Medicine, Isehara, Kanagawa, Japan.

5 Department of Systems Medicine, Graduate School of Medicine, Chiba University, Chiba, Japan.

6 Department of Medical Physiology, Chiba University, Graduate School of Medicine, Chiba, Japan.

7 Institute for Advanced Academic Research, Chiba University, Chiba, Japan.

8 Research Institute of Disaster Medicine, Chiba University, Chiba, Japan.

9 AMED-CREST, AMED, Otemachi, Tokyo, Japan.

\*Address for correspondence

Corresponding Author: Tomoaki Tanaka (email: [tomoaki@restaff.chiba-u.jp](mailto:tomoaki@restaff.chiba-u.jp))

1-8-1 Inohana, Chuoku, Chiba, Japan

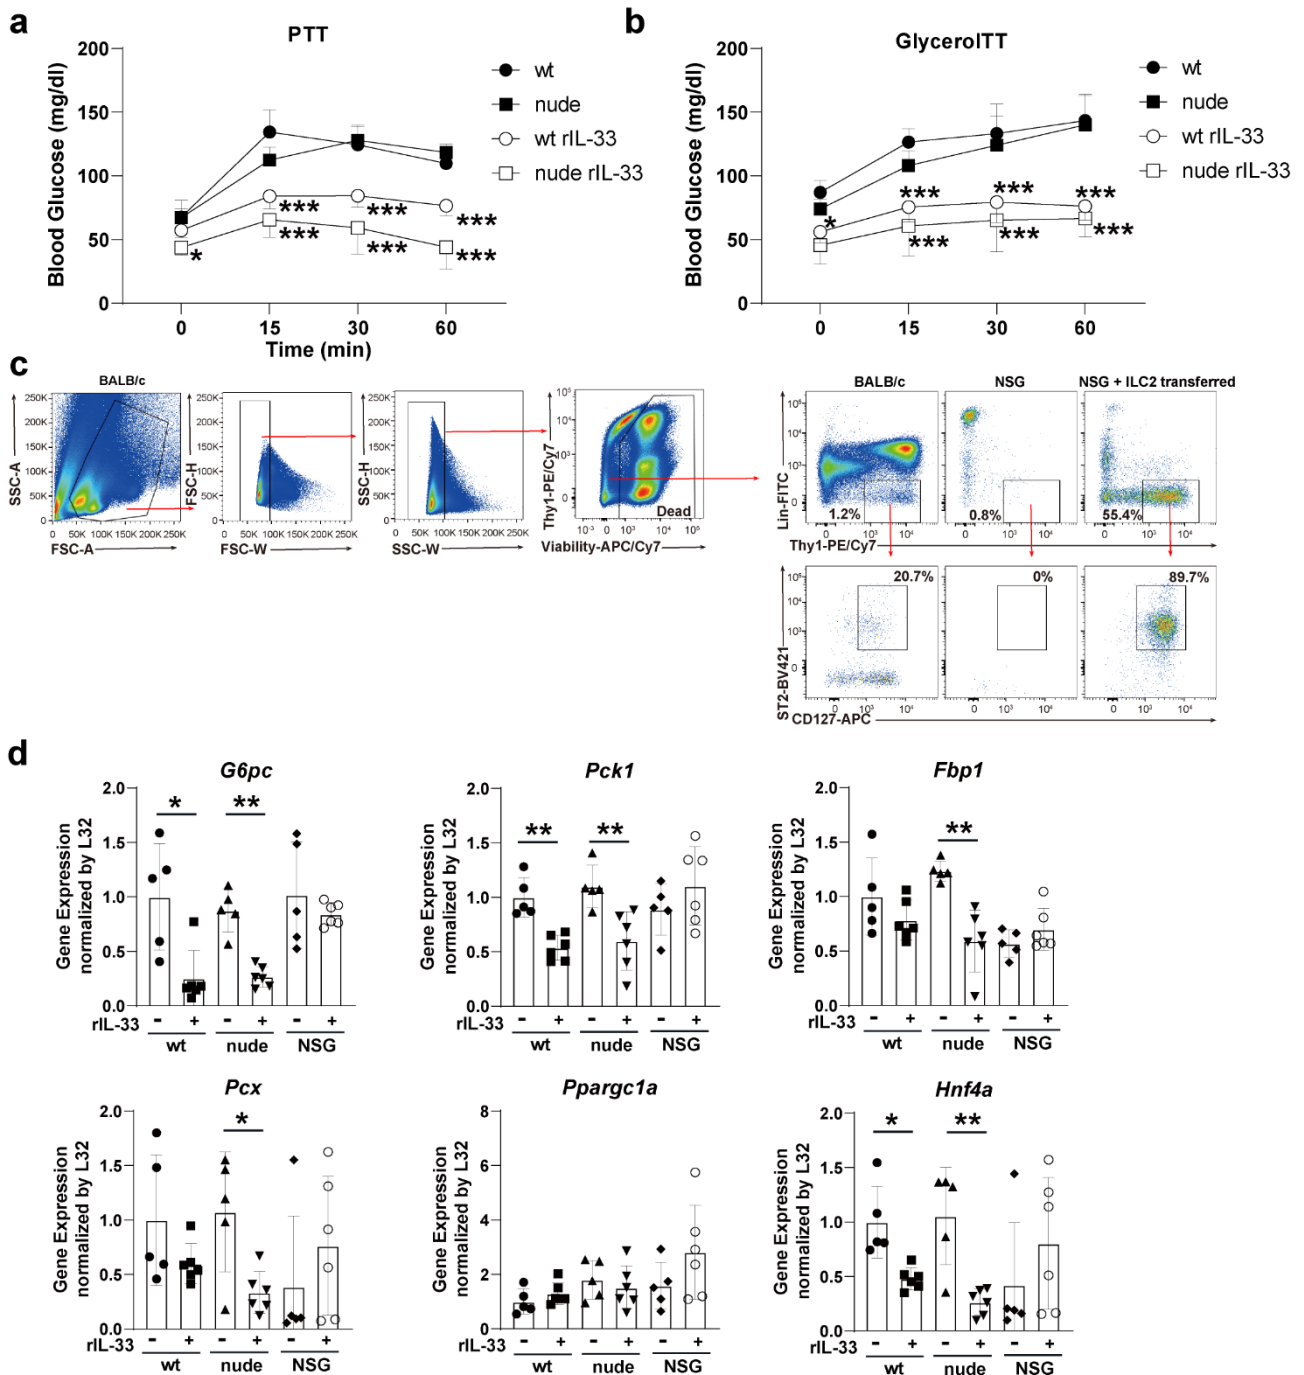

**Supplementary Figure 1. | Recombinant IL-33 (IL-33) injection exerts a blood-glucose-lowering effect by limiting gluconeogenesis, and liver group 2 innate lymphoid cells (ILC2) may mediate this effect.** Phosphate-buffered saline (PBS) or rIL-33 was injected for 5 consecutive days into wild-type (wt) or nude mice. After overnight fasting, blood glucose levels were measured in each mouse before and after intraperitoneal injection of pyruvate or glycerol. **a**, Blood glucose levels in wt BALB/c mice and nude mice as measured by the pyruvate tolerance test (2 g/kg of body weight, wt: n=7, wt rIL-33: n=5, nude: n=6, nude rIL-33: n=4). **b**, Blood glucose levels in wt and nude mice as measured

by the glycerol tolerance test (2 g/kg of body weight, wt: n=5, wt rIL-33: n=5, nude: n=6, nude rIL-33: n=4). **c**, Representative plot of gating for Lin<sup>-</sup>Thy1<sup>+</sup>CD127<sup>+</sup>ST2<sup>+</sup> ILC2s from wt BALB/c, nontransferred NOD/Scid/Il2Rγ<sup>null</sup> (NSG) and liver ILC2-transferred NSG mice. **d**, Real-time quantitative PCR (RT-qPCR) analysis of gluconeogenesis-related genes using liver tissues. PBS or rIL-33 was injected for 5 consecutive days into wt, nude or NSG mice (wt rIL-33[-]: n=5, wt rIL-33[+]: n=6, nude rIL-33[-]: n=5 nude rIL-33[+]: n=6 NSG rIL-33[-]: n=5, NSG rIL-33[+]: n=6). Unpaired one-sided Student's t test. \*P < 0.05; \*\*P < 0.01; \*\*\*P < 0.001. Each bar and its error bars represent the mean ± SD.

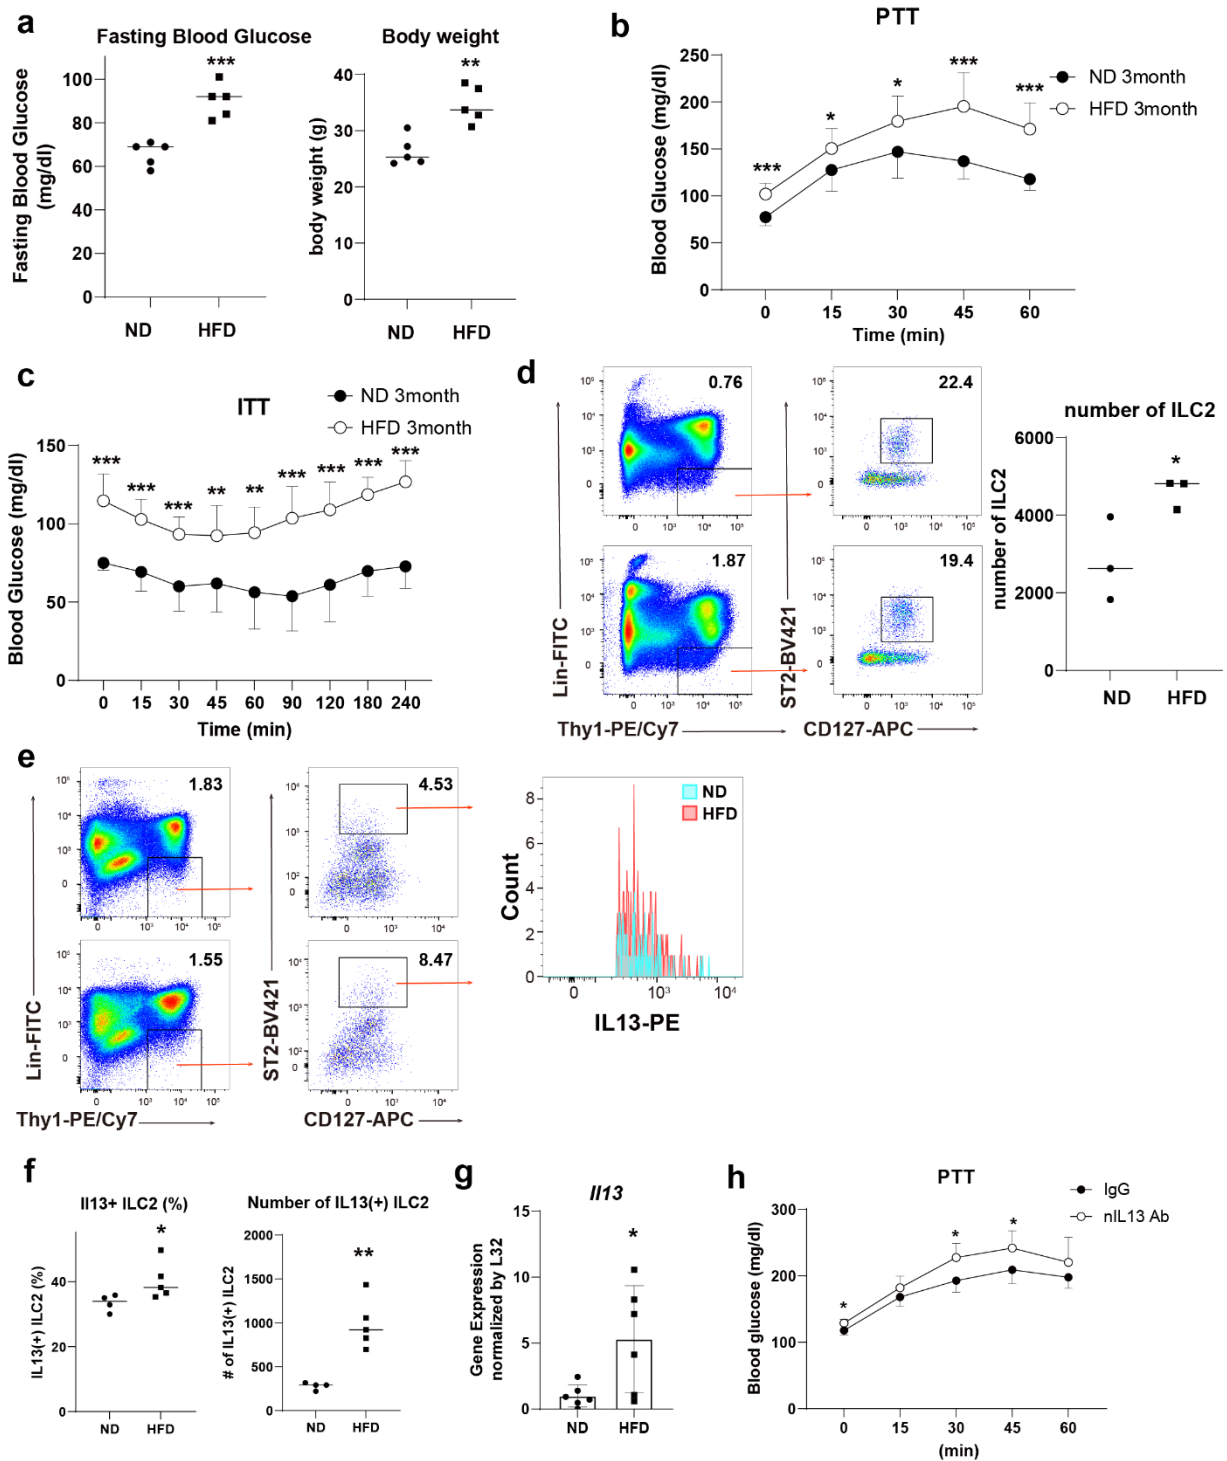

**Supplementary Figure 2. | Three-month high-fat diet (HFD)-fed mice show excessive gluconeogenesis, which is exacerbated by IL-13 neutralization.** **a**, Fasting blood glucose levels and body weights of 3-month normal diet (ND)-fed mice or HFD-fed mice (n = 5 per group). **b**, Blood glucose levels as measured by the pyruvate tolerance test (PTT; 2 g/kg of body weight, ND: n=8, HFD: n=9). **c**, Blood glucose levels as measured by the insulin tolerance test (0.1 U/kg body weight insulin, ND: n=8, HFD: n=9). **d**, Gating for Lin<sup>-</sup>Thy1<sup>+</sup>CD127<sup>+</sup>ST2<sup>+</sup> group 2 innate lymphoid cells (ILC2) and

the number of liver ILC2s in 3-month ND- or HFD-fed mice (left). Numbers of liver ILC2s (n=3 per group, right). **e**, Gating for Lin<sup>-</sup>Thy1<sup>+</sup>CD127<sup>+</sup>ST2<sup>+</sup> ILC2s (left) and intracellular IL-13 in 3-month ND- or HFD-fed mice. **f**, Lin<sup>-</sup>Thy1<sup>+</sup>CD127<sup>+</sup>ST2<sup>+</sup> ILC2s in liver tissues were evaluated. Percentages of IL-13(+) ILC2s in total ILC2s (left) and numbers of IL13(+) ILC2s (right). **g**, RT-qPCR analysis of *Il13* in liver tissues from ND- or HFD-fed mice (n=6 per group). **h**, Mice were fed a HFD for 3 months and intraperitoneally injected with control IgG or a neutralizing IL-13 antibody for 4 consecutive days. Then, blood glucose levels were measured by the PTT (2 g/kg of body weight, n = 4 per group). Unpaired one-sided Student's *t* test. \*P < 0.05; \*\*P < 0.01; \*\*\*P < 0.001. Each bar and its error bars represent the mean ± SD.

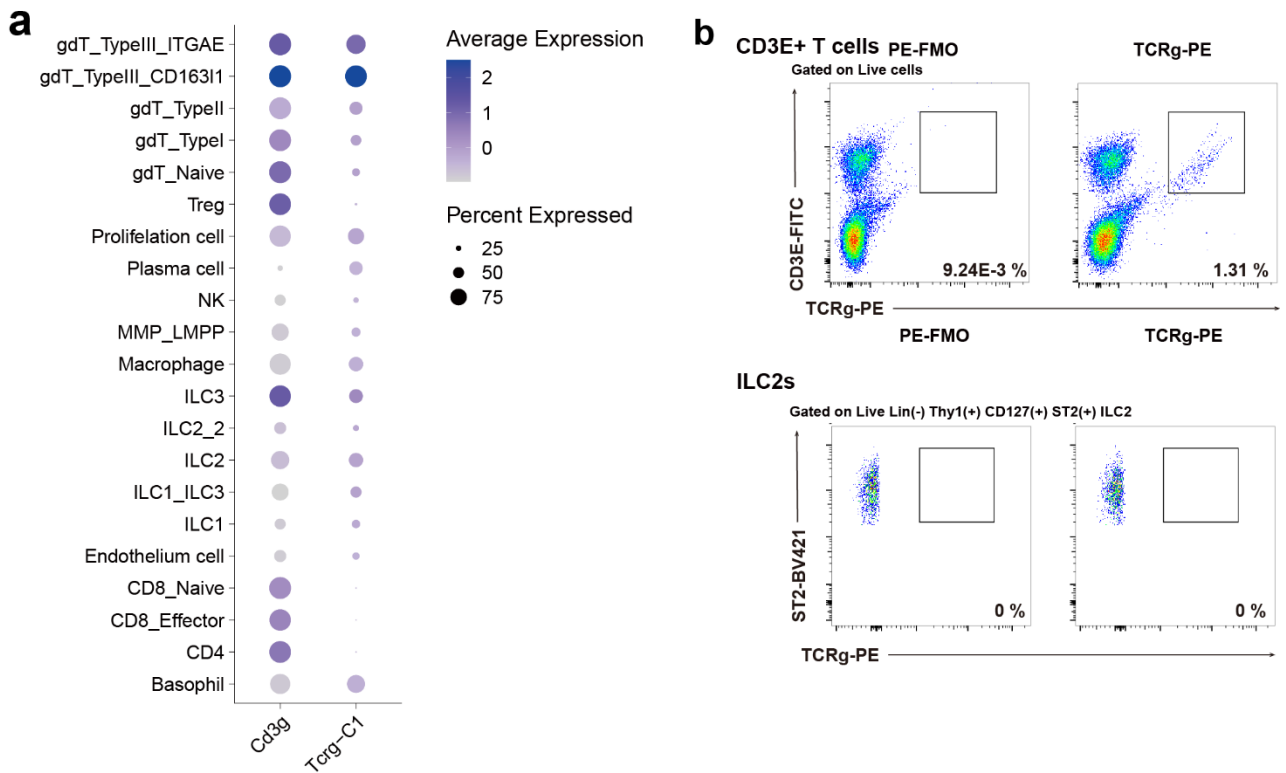

**Supplementary Figure 3. | *Cd3g* and *Terg-C1* are barely expressed on group 2 innate lymphoid cells (ILC2) compared with other cell types. a, Dot plot showing the gene expression of *Cd3g* and *Terg-C1* in all types of cells. b, Flow cytometry analysis of TCRg-PE in CD3E+ T cells or ILC2s from liver tissue.**

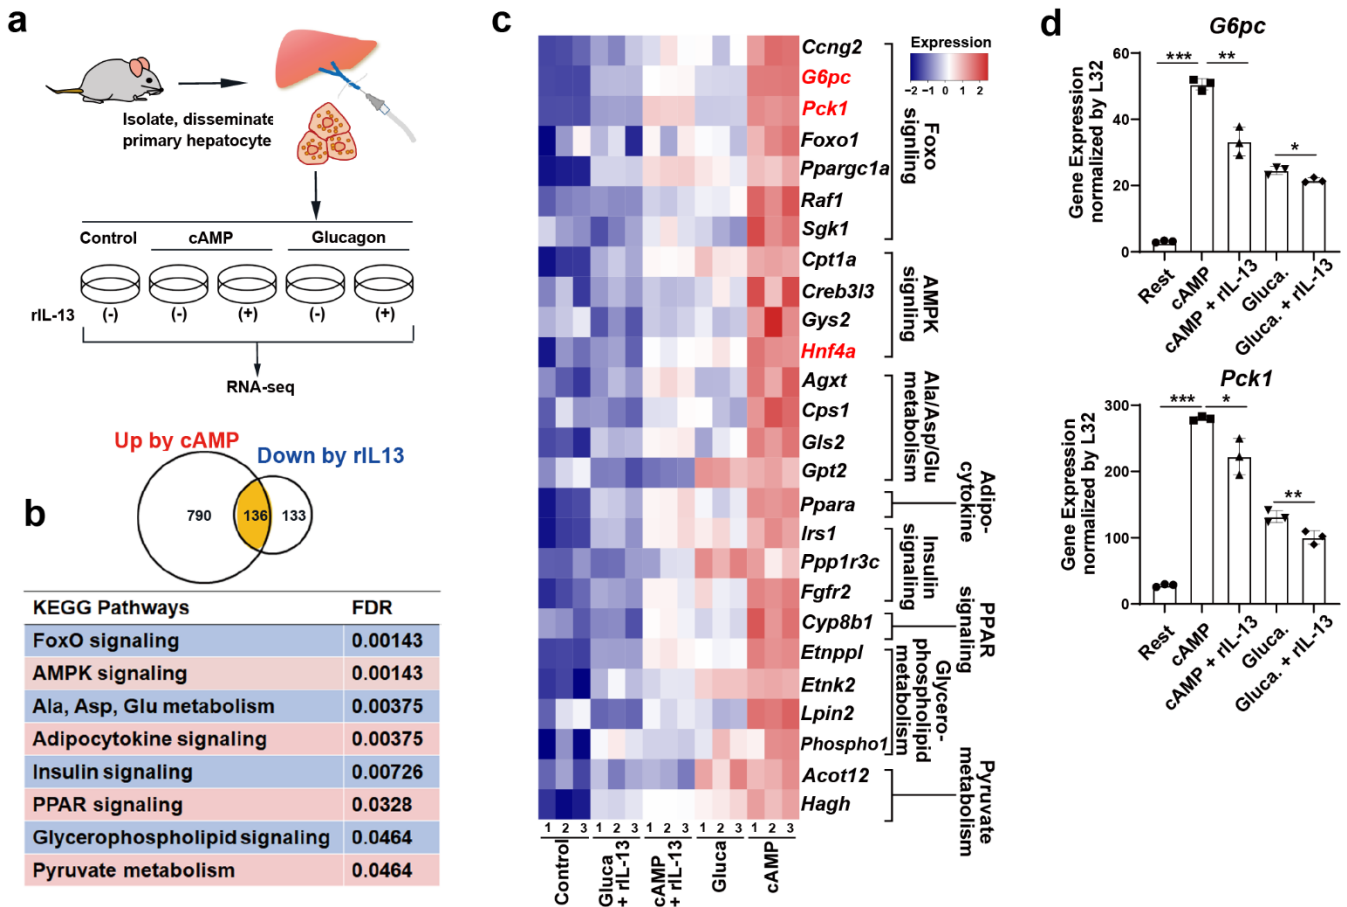

**Supplementary Figure 4. | Recombinant IL-13 (rIL-13) treatment directly suppresses gluconeogenesis in hepatocytes, as evaluated by RNA-seq and validated by real-time quantitative PCR (RT-qPCR).**

**a**, Experimental schematic for RNA-seq analysis of primary hepatocytes. Primary hepatocytes were isolated from C57BL/6 mice. Hepatocytes were treated with cAMP or glucagon for 3 h in the presence or absence of IL-13. **b**, Venn diagram showing 136 common differentially expressed genes (DEG) upregulated by cAMP and downregulated by IL-13 (upper panel). The table in the lower panel shows Kyoto Encyclopedia of Genes and Genomes (KEGG) pathways enriched in these DEGs. **c**, Heatmap showing the expression levels of genes and associated KEGG pathways, including *G6pc*, *Pck1*, and *Hnf4a*. **d**, RT-qPCR analysis of the *Hnf4a* downstream gluconeogenic enzymes *G6pc* and *Pck1* in IL-13-treated primary hepatocytes (normalized to *L32*) (n=3 per group). Unpaired one-sided Student's *t* test. \**P* < 0.05; \*\**P* < 0.01; \*\*\**P* < 0.001. Each bar and its error bars represent the mean ± SD.

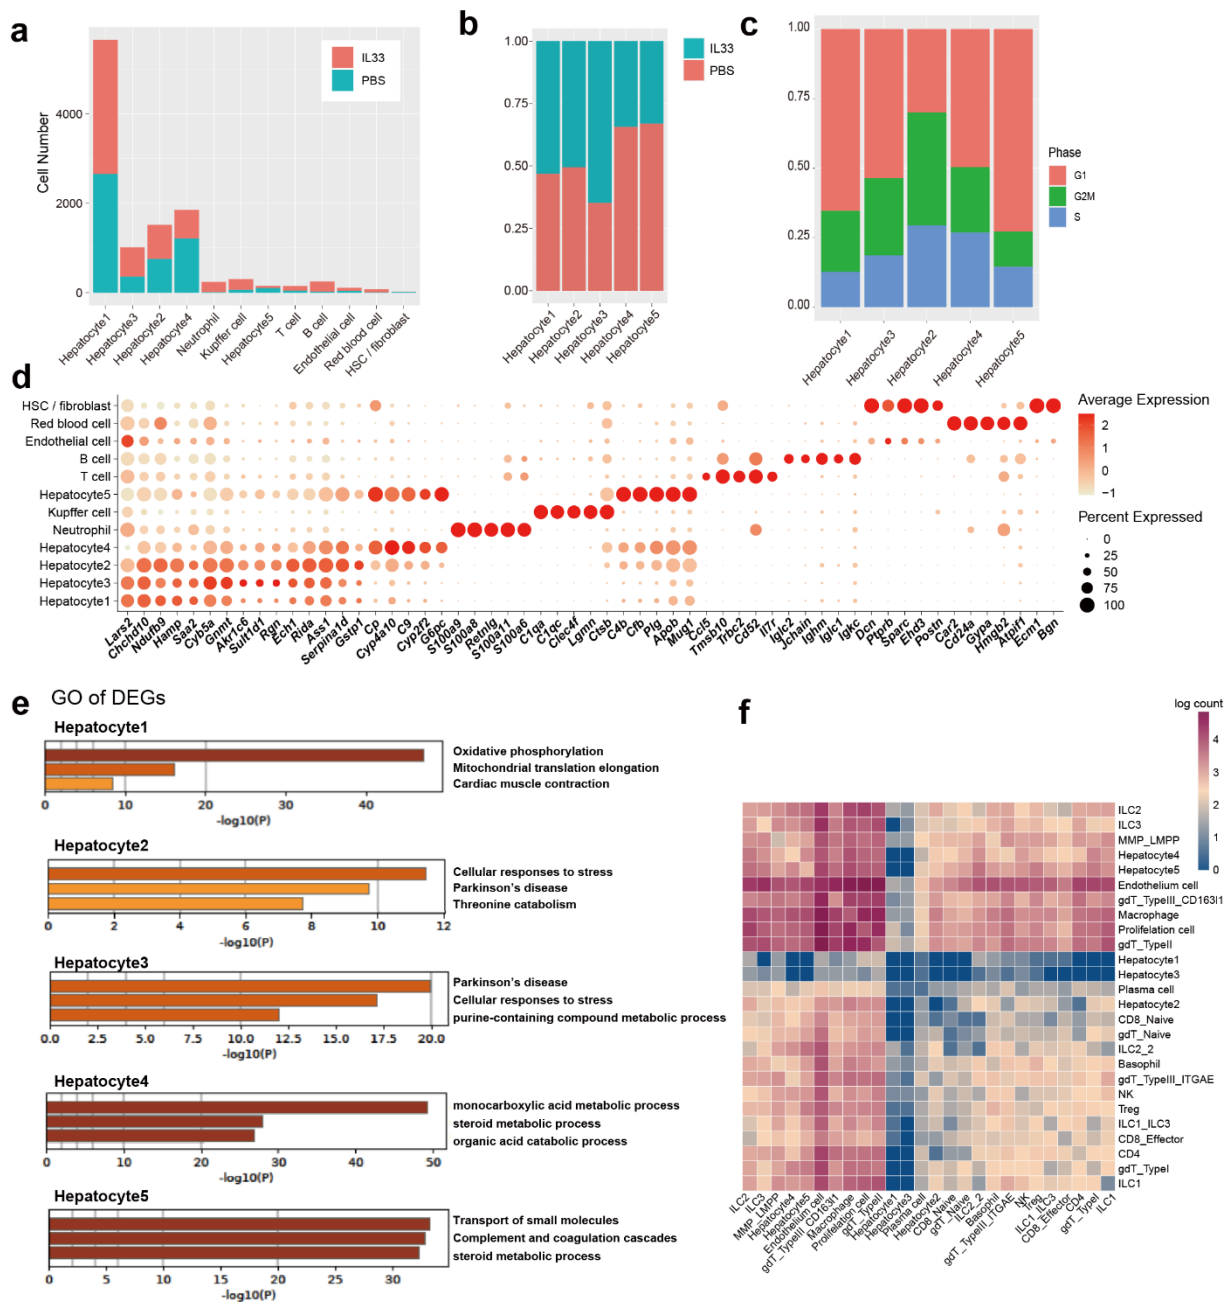

**Supplementary Figure 5. | Characteristics of all cell clusters, including hepatocyte clusters.**

Single-cell RNA sequencing (scRNA-seq) data of hepatocyte-enriched cells in liver tissue (n = 11,327 single cells from the liver) from phosphate-buffered saline- and recombinant IL-33 (rIL-33)-treated livers. **a**, Cell numbers of the cell types within each treatment condition. **b**, Cell number ratio of each hepatocyte cluster within each treatment condition. **c**, Cell cycle phase within each hepatocyte cluster. **d**, Dot plot showing differentially expressed genes (DEG) for each cell type as defined by the FindAllMarkers function. **e**, Enriched Gene Ontology terms in each hepatocyte cluster (hepatocyte clusters 1–5). **f**, CellPhoneDB analysis. The interaction heatmap plots the total numbers of receptor and ligand interactions for the indicated cell types.



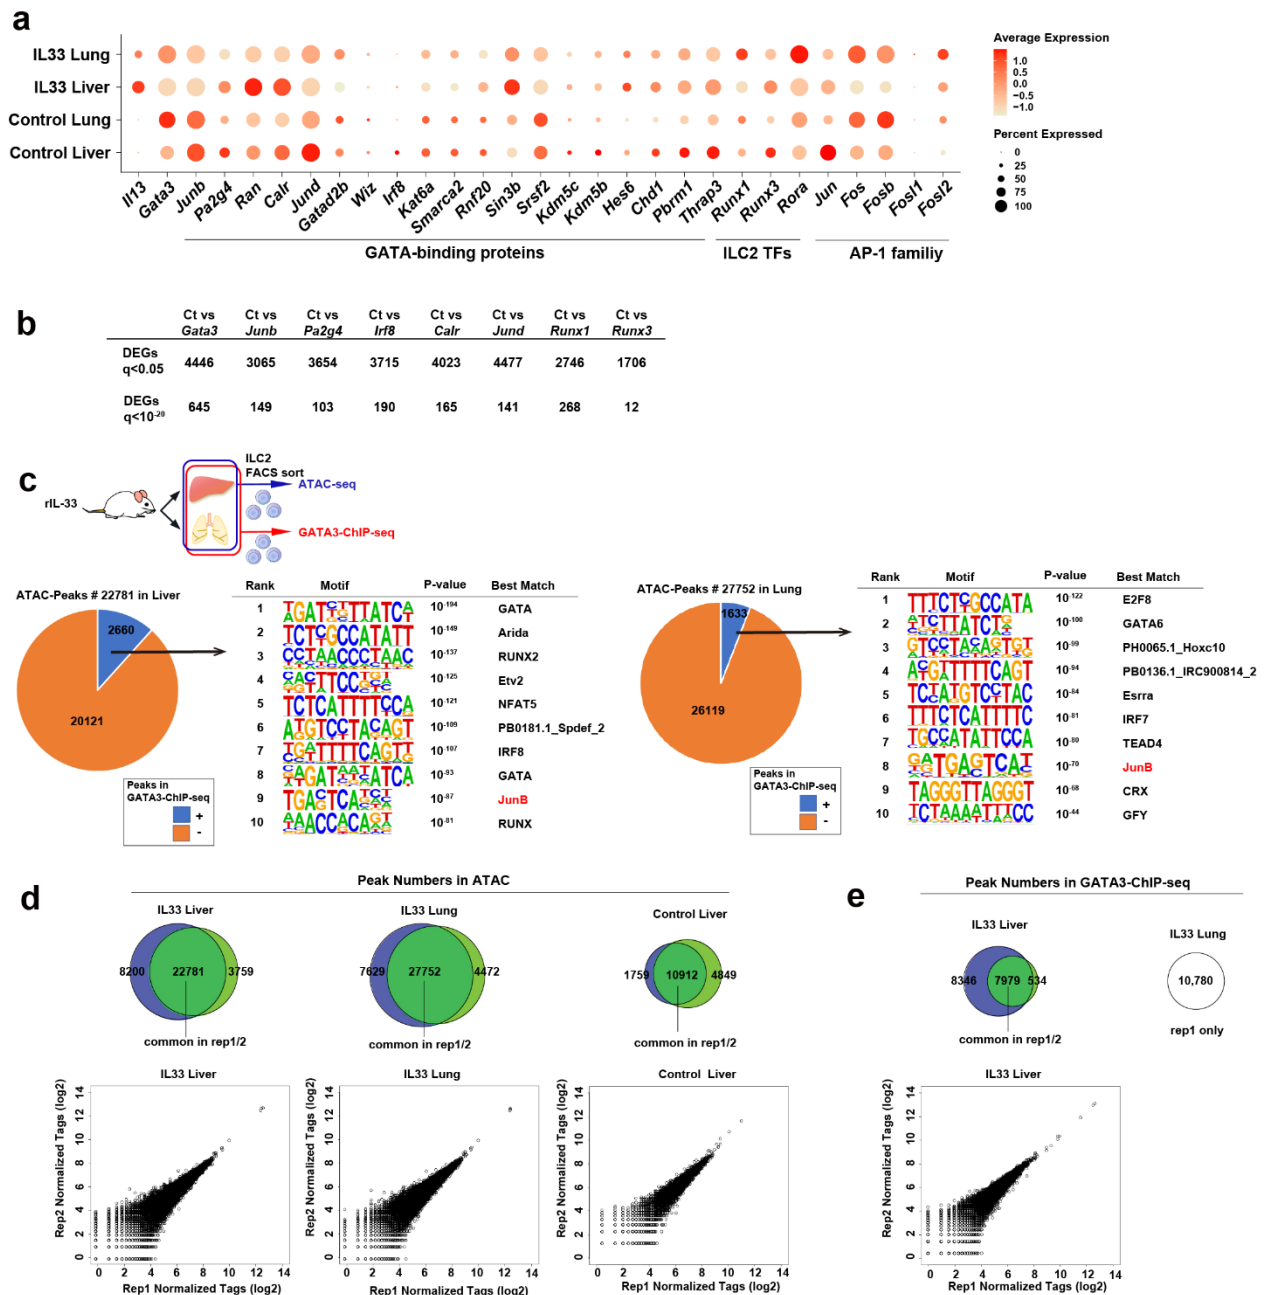

**Supplementary Figure 6. | AP-1 family members bind to GATA3 in liver and lung group 2 innate lymphoid cells (ILC2) and suppress GATA3 function to induce *Irf3* expression.** **a**, Expression levels of *Irf3* and GATA3-binding proteins, ILC2 transcription factors, and AP-1 family members, as determined by single-cell RNA sequencing (scRNA-seq) data. **b**, Number of differentially expressed genes (DEG) defined by the threshold  $q < 0.05$  and  $q < 10^{-20}$ . Data for DEGs between ILC2s treated with Ct si and each siRNA are shown ( $n=3$ ). **c**, Experimental schema of assay for transposase-accessible chromatin with high-throughput sequencing (ATAC-seq) and GATA3 chromatin immunoprecipitation sequencing (ChIP-seq). ILC2s were sorted from the livers and lungs of recombinant IL-33 (rIL-33)-treated mice. The pie chart shows the fraction of GATA3-bound ATAC-

seq peaks in the liver (left) and lungs (right). A motif analysis was conducted for the GATA3-bound ATAC-seq peaks, and the result is shown with a P value and corresponding DNA binding protein for each enriched motif. **d**, Venn diagram of ATAC-seq peaks from two biological replicates (upper). Scatter plot of the ATAC-seq normalized tags ( $\log_2$ ) between two replicates (lower). The results in rIL-33-treated liver (left), rIL-33-treated lung (middle), and phosphate-buffered saline (PBS)-treated liver (right) ILC2s are shown. **e**, Venn diagram of GATA3 ChIP-seq peaks from two biological replicates in rIL-33-treated liver ILC2s (upper left) and corresponding scatter plot of the ChIP-seq normalized tags (lower left). The number of GATA3 ChIP-seq peaks in rIL-33-treated lung ILC2s is also shown (upper right).

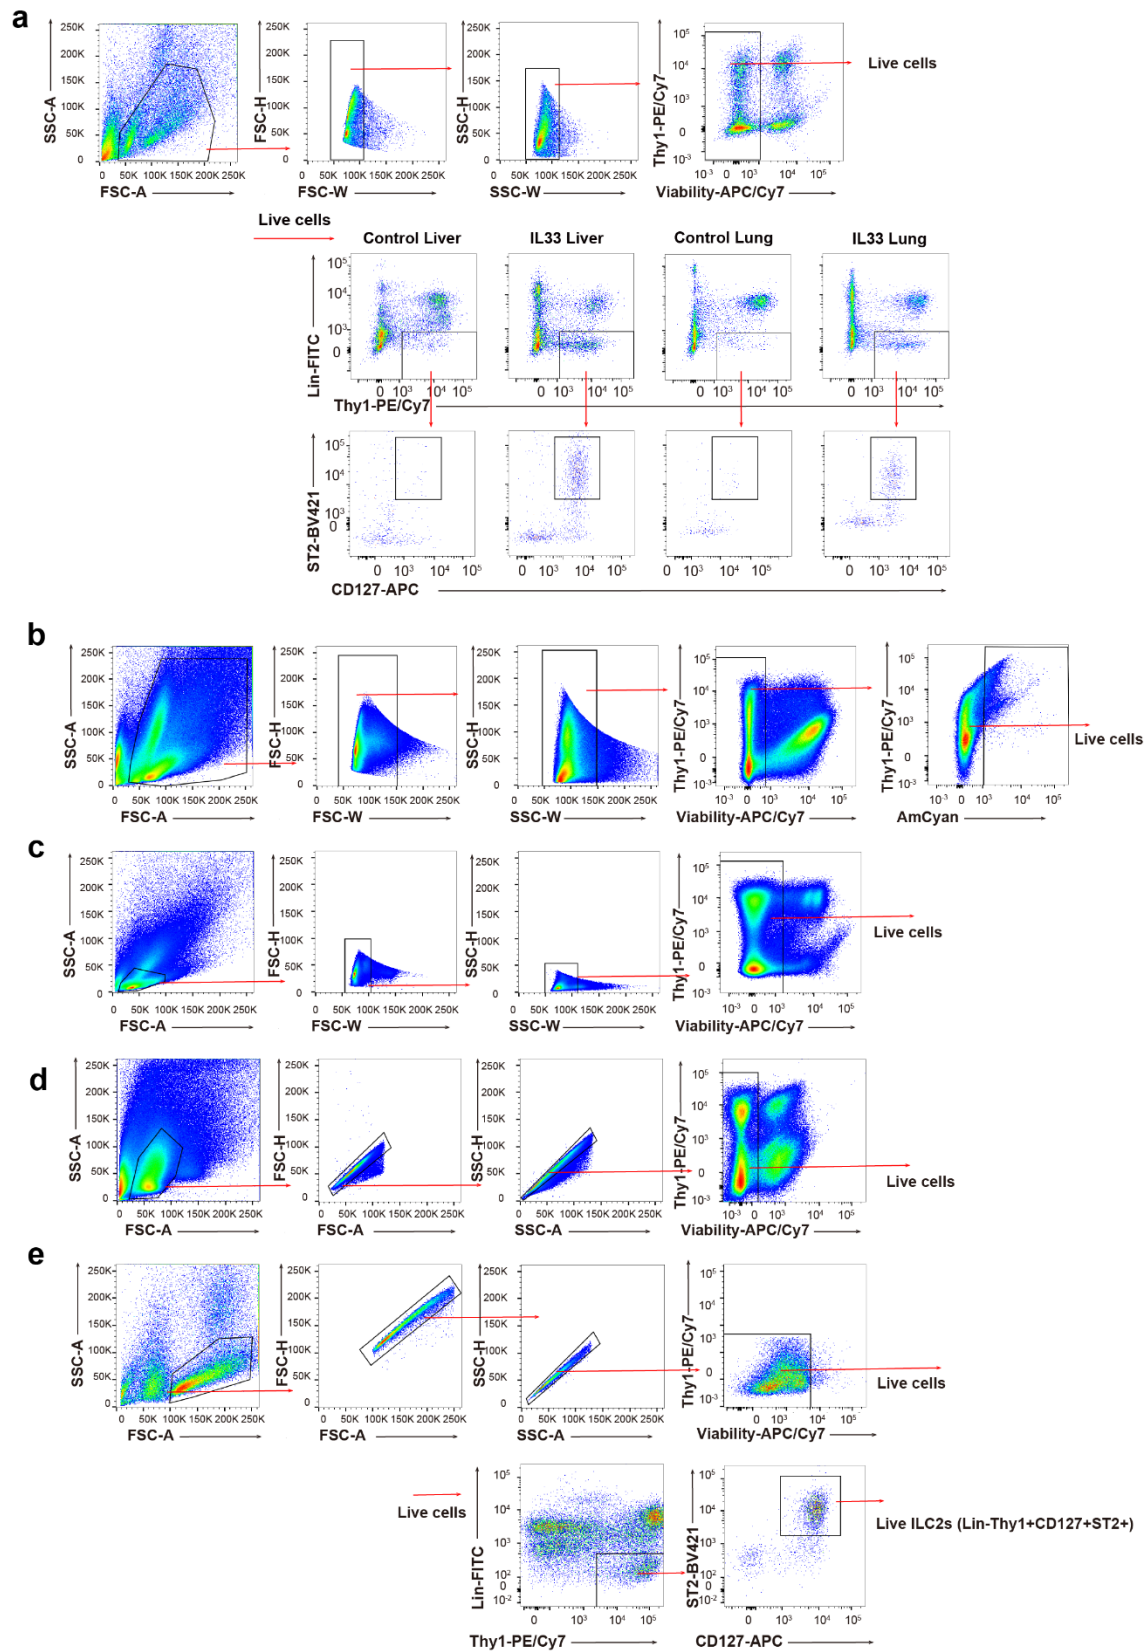

**Supplementary Figure 7. | Gating strategies for cell sorting.**

a, Gating strategy to sort ILC2s (Lin<sup>-</sup>Thy1<sup>+</sup>CD127<sup>+</sup>ST2<sup>+</sup>) from wild-type BALB/c mice treated with

Phosphate-buffered saline (PBS) or rIL-33 presented on Fig. 2a and 3a. **b**, Gating strategy to sort ILC2s (Lin<sup>-</sup>Thy1<sup>+</sup>CD127<sup>+</sup>ST2<sup>+</sup>) from wild-type BALB/c mice treated with Phosphate-buffered saline (PBS) or rIL-33 presented on Fig. 3h. **c**, Gating strategy to sort ILC2s (Lin<sup>-</sup>Thy1<sup>+</sup>CD127<sup>+</sup>ST2<sup>+</sup>) from 3-month normal diet (ND)-fed mice or HFD-fed BALB/c mice on Supplementary Fig. 2d. **d**, Gating strategy to sort ILC2s (Lin<sup>-</sup>Thy1<sup>+</sup>CD127<sup>+</sup>ST2<sup>+</sup>) from 3-month normal diet (ND)-fed mice or HFD-fed BALB/c mice on Supplementary Fig. 2e. **e**, Gating strategy to sort T cells (CD3<sup>+</sup>) or ILC2s (Lin<sup>-</sup>Thy1<sup>+</sup>CD127<sup>+</sup>ST2<sup>+</sup>) from wild-type BALB/c mice on Supplementary Fig. 3b.

## Supplementary Table 1

### Primer sequences

List of primers for quantitative

(qPCR)

| Target          | Forward                    | Reverse                  |
|-----------------|----------------------------|--------------------------|
| L32             | GCTGCCATCTGTTTACGG         | TGACTGGTGCCTGATGAACT     |
| <i>Il4</i>      | CATCGGCATTTTGAACGAG        | CGAGCTACTCTCTGTGGTG      |
| <i>Il5</i>      | ACATTGACCGCCAAAAAGAG       | ATCCAGGAACTGCCTCGTC      |
| <i>Il6</i>      | GCTACCAAACCTGGATATAATCAGGA | CCAGGTAGCTATGGTACTCCAGAA |
| <i>Il9</i>      | GCCTCTGTTTGTCTTTCAGTT      | GCATTTTGACGGTGGATCAT     |
| <i>Il13</i>     | CCTCTGACCCTTAAGGAGCTTAT    | CGTTGCACAGGGGAGTCT       |
| <i>Gata3</i>    | TTATCAAGCCCAAGCGAAG        | TGGTGGTGGTCTGACAGTTC     |
| <i>Il1rl1</i>   | GCTGAGGAATAAAGATGGCTAGG    | GCTCTCTGAGGTAGGGTCCA     |
| <i>G6pc</i>     | TGTGTCTGGTAGGCAA           | AACATCGGAGTGACCT         |
| <i>Pck1</i>     | ATCCCAACTCGAGATTCTGC       | CCCAGGCAGGGTCAATAAT      |
| <i>Pcx</i>      | AATGTCCGGCGTCTGGAGTA       | ACGCACGAAACACTCGGAT      |
| <i>Fbp1</i>     | CACCGCGATCAAAGCCATCT       | CCAGTCACATTGGTTGAGCCA    |
| <i>Ppargc1a</i> | TATGGAGTGACATAGAGTGTGCT    | GTCGCTACACCACTTCAATCC    |
| <i>Pfkl</i>     | GGAGGCGAGAACATCAAGCC       | GCACTGCCAATAATGGTGCC     |
| <i>Pklr</i>     | GAACATTGCACGACTCAACTTC     | CAGTGCGTATCTCGGGACC      |
| <i>Hnf4a</i>    | AAGGTGCCAACCTCAATTCATC     | CACATTGTCGGCTAAACCTGC    |
| <i>Areg</i>     | AAGAAAACGGGACTGTGCAT       | GGCTTGGAATGATTCAACT      |
| <i>Tnf</i>      | TCTTCTCATTCTGCTTGTGG       | GGTCTGGGCCATAGAACTGA     |
| <i>Junb</i>     | TCACGACGACTCTTACGCAG       | CCTTGAGACCCCGATAGGGA     |
| <i>Pa2g4</i>    | GCAGGAGCAAACCTATCGCC       | ACCAAAGATCGAAGCACCCG     |
| <i>Irf8</i>     | AGACCATGTTCCGTATCCCCT      | CACAGCGTAACCTCGTCTTCC    |
| <i>Calr</i>     | GCAGACCCTGCCATCTATTTT      | TCGGACTTATGTTTGGATTTCGAC |
| <i>Jund</i>     | GAAACGCCCTTCTATGGCGA       | CAGCGCGTCTTTCTTCAGC      |
| <i>Runx1</i>    | TGGTGGAGGTAAGCTGACC        | CGAGTAGTTTTTCATCGTTGCCTG |
| <i>Runx3</i>    | GACTCCTTCCCCAACTATAACCC    | CGCTGTTCTCGCCCATCTT      |
| <i>Jun</i>      | TTCCTCCAGTCCGAGAGCG        | TGAGAAGGTCCGAGTCTTGG     |
| <i>Fos</i>      | CGGGTTTCAACGCCGACTA        | TGGCACTAGAGACGGACAGAT    |
| <i>Fosb</i>     | CCTCCGCCGAGTCTCAGTA        | CCTGGCATGTCATAAGGGTCA    |
| <i>Fosl2</i>    | CACGCCGAGTCTACTCCA         | GTGGGCTGTACCATCCACTG     |

List of primers for chromatin immunoprecipitation with quantitative PCR (ChIP-qPCR)

| Target                                | Forward                  | Reverse                    |
|---------------------------------------|--------------------------|----------------------------|
| STAT3 binding motif ( <i>G6pc</i> )   | GCTTGGTTGTGTGCTTTGCCTAGC | GCTGACCTTAAATTCTCTCTGTAGCC |
| STAT3 binding motif ( <i>Pck1</i> )   | GTTGCTCAAGTGCCAC         | GTAGACCCTTCAGTGTC          |
| STAT3 binding motif2 ( <i>Hnf4a</i> ) | GATGAGGACCAGATTTGCCGA    | AAACTACCAGCCTGCCTTCTC      |
| NC ( <i>Hnf4a</i> )                   | AAGCTGGCCTCAAACCTCACA    | ATTCTGGCACTTGGAGGTGG       |
| JUNB binding motif 1-1                | CCCCTGGTCTCTGCTTTGTTG    | TCCTTTAGCGGCCACTGGAT       |
| JUNB binding motif 1-2                | TCTGCTTTGTTGGGCATTATCTG  | TGTCACAGACCCTTCTCAAT       |
| JUNB binding motif 2                  | GTGGCAGATCCCTTGGAGGT     | CCTTCTGCTTGTCTTGAGGGG      |
| NC1 ( <i>Il13</i> )                   | CAGGCTCAAGGCATTTGTCG     | TGGATGACAGTGACAACCTCC      |
| NC2 ( <i>Il13</i> )                   | GCCACCTCTAAGACCTACAGC    | TAAGGAGACTTGGTGAGCATGG     |

| Target                                | Note                                                      |
|---------------------------------------|-----------------------------------------------------------|
| STAT3 binding motif ( <i>G6pc</i> )   | 5 kb upstream from <i>G6pc</i> TSS                        |
| STAT3 binding motif ( <i>Pck1</i> )   | 1 kb upstream from <i>Pck1</i> TSS                        |
| STAT3 binding motif2 ( <i>Hnf4a</i> ) | 1.5 kb upstream from <i>Hnf4a</i> TSS                     |
| NC ( <i>Hnf4a</i> )                   | 5.3 kb upstream from <i>Hnf4a</i> TSS without STAT3 motif |
| JUNB binding motif 1-1                | 40 base upstream from <i>Il13</i> TSS                     |
| JUNB binding motif 1-2                | 40 base upstream from <i>Il13</i> TSS                     |
| JUNB binding motif 2                  | 2.9 kb upstream from <i>Il13</i> TSS                      |
| NC1 ( <i>Il13</i> )                   | 11.1 kb upstream from <i>Il13</i> TSS without JUNB motif  |
| NC2 ( <i>Il13</i> )                   | 11.5 kb upstream from <i>Il13</i> TSS without JUNB motif  |

## Supplementary Table 2

List of genes ignored in the clustering of scRNA-seq samples.

"mt-“, "mmu", "sno", "Gm", "Rn6", "RNA", "7SK", "SNORD", "SNORA", "SCARNA", "B3g",  
"Vmn", "Mir", "Rik", "Snora", "Snord", "LOC", "Rn4", "OTTMUSG", "Scarna", "Rnu", "Rmr", "Rpl", "Rp  
s", "AA", "AB", "AC", "AF", "AI", "AL", "AU", "AV", "AW", "AY", "Malat", "Tpt1", "B2m", "Actb", "Vim",  
"Tmsb4x", "Eef", "Fau", "BC", "B9d", "BX", "ERCC", "Hist", "Igkv", "Olfir", "RP", "n-  
", "BB", "BY", "B4g", "CK", "CN", "CR", "CT", "Hbb", "Hba", "n-“.

### Supplementary Table 3

The list of antibodies.

#### Surface marker antibodies for flowcytometry:

viability dye APC-Cy7 (eBioscience, 65-0865-14, 1:1000)  
anti-CD16/CD32 (eBioscience, 14-0161-82, 93, 1:33)  
anti-lineage cocktail-FITC  
(BioLegend, 133302, 145-2C11; RB6-8C5; RA3-6B2; Ter-119; M1/70, 1:40)  
anti-TCR $\beta$ -FITC (BioLegend, 109206, H57-597, 1:200)  
anti-CD90.2-PE/Cy7 (BioLegend, 105326, 30-H12, 1:200)  
anti-CD127-APC (BioLegend, 135012, A7R34, 1:100)  
anti-ST2-BV421 (BioLegend, 145309, DIH9, 1:100)  
anti-CD3E-FITC (BioLegend, 100203, 17A2, 1:200)  
anti-TCRg-PE (BioLegend, 118107, GL3, 1:100)

#### Intracellular cytokine antibodies for flowcytometry:

anti-IL-13 (BioLegend, 159403, W17010B, 1:100)

#### Antibodies for immunoprecipitation:

anti-GATA3 (Santa Cruz, sc-268, 1  $\mu$ g/ml ; R&D Systems, MAB26051, 1  $\mu$ g/ml)  
anti-JunB (Santa Cruz, sc-8051, 1:50; Cell signaling, C37F9 (#3753), 1:50)  
anti-STAT3 (Cell signaling, 124H6 (#9139), 1:100; D3Z2G (#12640), 1:50)  
anti-Flag M2 agarose (Sigma–Aldrich, A2220, 50  $\mu$ l/sample)

#### Antibodies for western blot

anti-JunB (Sant Cruz, sc8051, 1  $\mu$ g/ml)  
anti-Flag (Sigma, A2220, 1  $\mu$ g/ml)  
anti-Tubulin  $\alpha$  (Sigma, T6119, 1  $\mu$ g/ml)

#### Antibodies for Immunofluorescence:

anti-KLRG1 (1:25, FITC conjugated, Biolegend, 138409)  
rabbit anti-PCK1 (1:50, abcam, ab70358)  
anti-CD3e (1:25, biotin conjugated, eBioscience, 13-0033-82)  
Alexa Fluor 647 goat anti-rabbit antibody (1:50, Molecular Probes, A-21244)  
Alexa Fluor 594 streptavidin (1:50, Jackson ImmunoResearch, 016-580-084)
